# Supplementary material for: A Continuously Benchmarked and Crowdsourced Challenge for Rapid Development and Evaluation of Models to Predict COVID-19 Diagnosis and Hospitalization
Source: PubMed Central journal article supplement (PMC8506231; doi:10.1001/jamanetworkopen.2021.24946), 2021-10-11
Supplement: jamanetwopen-e2124946-s002.pdf [file jamanetwopen-e2124946-s002.pdf]

\*Indicates required information. Only first name, last name, and suffix will appear in PubMed.

| <b>*Group Name(s): the DREAM Challenge Consortium</b> |                     |                              |                         |                                                                                                                                                                                                                         |                                                 |                                                                |                                                                                                   |
|-------------------------------------------------------|---------------------|------------------------------|-------------------------|-------------------------------------------------------------------------------------------------------------------------------------------------------------------------------------------------------------------------|-------------------------------------------------|----------------------------------------------------------------|---------------------------------------------------------------------------------------------------|
| <b>*First Name and Middle Initial(s)</b>              | <b>*Last Name</b>   | <b>*Suffix (eg, Jr, III)</b> | <b>Academic Degrees</b> | <b>Institution</b>                                                                                                                                                                                                      | <b>Location (city, state/province, country)</b> | <b>Role or Contribution, eg, chair, principal investigator</b> | <b>Group (if more than 1 Group listed in the byline) and/or Subgroup (eg, Steering Committee)</b> |
| Chethan                                               | Jujavarapu          |                              | BS                      | Biomedical Informatics and Medical Education, University of Washington                                                                                                                                                  | Seattle, WA, USA                                |                                                                |                                                                                                   |
| jason                                                 | thomas              |                              | BS                      | University of Washington Department of Biomedical Informatics and Medical Information                                                                                                                                   | Seattle, WA, USA                                |                                                                |                                                                                                   |
| Martin                                                | Gunn                |                              | MBChB                   | Department of Radiology, University of Washington                                                                                                                                                                       | Seattle, WA, USA                                |                                                                |                                                                                                   |
| YiFan                                                 | Wu                  |                              | MPH                     | Biomedical and Health Informatics, University of Washington                                                                                                                                                             | Seattle, WA, USA                                |                                                                |                                                                                                   |
| Nicholas                                              | Dobbins             |                              | MLIS                    | Department of Biomedical Informatics & Medical Education, University of Washington ; Research Information Technology University of Washington Medicine                                                                  | Seattle, WA, USA                                |                                                                |                                                                                                   |
| Vikas                                                 | O'Reilly-Shah       |                              | MD, PhD, FASA           | Department of Anesthesiology & Pain Medicine, University of Washington; Department of Anesthesiology & Pain Medicine, Seattle Children's Hospital                                                                       | Seattle, WA, USA                                |                                                                |                                                                                                   |
| Andrew                                                | Teng                |                              | MS                      | Biomedical Informatics and Medical Education, University of Washington                                                                                                                                                  | Seattle, WA, USA                                |                                                                |                                                                                                   |
| Noah                                                  | Hammarlund          |                              | PhD                     | School of Pharmacy, The Comparative Health Outcomes, Policy, and Economics (CHOICE) Institute, University of Washington; Biomedical Informatics and Medical Education, University of Washington                         | Seattle, WA, USA                                |                                                                |                                                                                                   |
| Graham                                                | Nichol              |                              | MD MPH                  | University of Washington-Harborview Center for Prehospital Emergency Care; Departments of Medicine and Emergency Medicine, University of Washington                                                                     | Seattle, WA, USA                                |                                                                |                                                                                                   |
| Pascal                                                | Brandt              |                              | MSc                     | Biomedical Informatics and Medical Education, University of Washington                                                                                                                                                  | Seattle, WA, USA                                |                                                                |                                                                                                   |
| Vikas                                                 | Pejaver             |                              | PhD                     | Washington                                                                                                                                                                                                              | Seattle, WA, USA                                |                                                                |                                                                                                   |
| Beth                                                  | Britt               |                              | PhD                     | ITS Analytics, UW Medicine                                                                                                                                                                                              | Seattle, WA, USA                                |                                                                |                                                                                                   |
| Yuanfang                                              | Guan                |                              | PhD                     | Department of Computational Medicine and Bioinformatics, University of Michigan                                                                                                                                         | Ann Arbor, MI, USA                              |                                                                |                                                                                                   |
| Lingrui                                               | Cai                 |                              | MSc                     | Ann Arbor Algorithms                                                                                                                                                                                                    | Ann Arbor, MI, USA                              |                                                                |                                                                                                   |
| Kaiman                                                | Zeng                |                              | PhD                     | Department of Electrical Engineering, College of Engineering and Applied Sciences, Arkansas Tech University                                                                                                             | Russellville, Arkansas, USA                     |                                                                |                                                                                                   |
| Bruce                                                 | Cragin              |                              | PhD                     | Wind City Applied Research                                                                                                                                                                                              | Lempster, NH, United States                     |                                                                |                                                                                                   |
| Shirya                                                | Kaul                |                              | MSc                     | Science and Engineering faculty , Queensland university of Technology                                                                                                                                                   | Brisbane, Queensland, Australia                 |                                                                |                                                                                                   |
| Jennifer                                              | Fowler              |                              | BS                      | Arkansas State University, Arkansas AI Campus                                                                                                                                                                           | Jonesboro, AR, USA                              |                                                                |                                                                                                   |
| Oznur                                                 | Tastan              |                              | PhD                     | Faculty of Science and Engineering, Sabanci University                                                                                                                                                                  | Tuzla, İstanbul, Turkey                         |                                                                |                                                                                                   |
| Vladimir                                              | Kovacevic           |                              | PhD                     | Department for Computer science, School of Electrical engineering, University in Belgrade                                                                                                                               | Belgrade, Serbia                                |                                                                |                                                                                                   |
| Ege                                                   | Alpay               |                              | BS                      | Graduate School of Engineering and Natural Sciences, Sabanci University                                                                                                                                                 | Istanbul, Turkey                                |                                                                |                                                                                                   |
| Luiza                                                 | Romanovskii-Chernik |                              | MSc                     | Department of Software and Information Systems Engineering, Ben-Gurion University of the Negev                                                                                                                          | Beer Sheva, Israel                              |                                                                |                                                                                                   |
| Aleksandr                                             | Romanovskii-Chernik |                              | MSc                     | Department of Software and Information Systems Engineering, Ben-Gurion University of the Negev                                                                                                                          | Beer Sheva, Israel                              |                                                                |                                                                                                   |
| Alper                                                 | Bingol              |                              | -                       | Computer Science and Engineering, Faculty of Engineering and Natural Science, Sabanci University                                                                                                                        | Istanbul, Turkey                                |                                                                |                                                                                                   |
| Sema                                                  | Yilmazer            |                              | -                       | Computer Science and Engineering, Faculty of Engineering and Natural Science, Sabanci University                                                                                                                        | Istanbul, Turkey                                |                                                                |                                                                                                   |
| Shankai                                               | Yan                 |                              | PhD                     | National Center for Biotechnology Information, National Library of Medicine, National Institutes of Health                                                                                                              | Bethesda, Maryland, USA                         |                                                                |                                                                                                   |
| Santina                                               | Lin                 |                              | MSc                     | College of Computing, Georgia Institute of Technology                                                                                                                                                                   | Atlanta, Georgia, USA                           |                                                                |                                                                                                   |
| Ege                                                   | Arikan              |                              | BS                      | Computer Science and Engineering, Faculty of Engineering and Natural Science, Sabanci University                                                                                                                        | Istanbul, Turkey                                |                                                                |                                                                                                   |
| Lav                                                   | Varshney            |                              | PhD                     | Salesforce Research; University of Illinois at Urbana-Champaign                                                                                                                                                         | Urbana, IL, USA                                 |                                                                |                                                                                                   |
| Jimmy                                                 | Phuong              |                              | PhD                     | Division of Biomedical and Health Informatics, University of Washington; UW Medicine Research Information Technology, University of Washington; Harborview Injury Prevention Research Center, University of Washington, | Seattle, WA, USA                                |                                                                |                                                                                                   |
